# Supplementary material
Source: publisher site journal article supplement (https://www.dovepress.com/article/576446)
Supplement: Supplementary file 1 [file 576446_Supplementary_Figures.pdf › 576446_Supplementary_Figures.pdf]

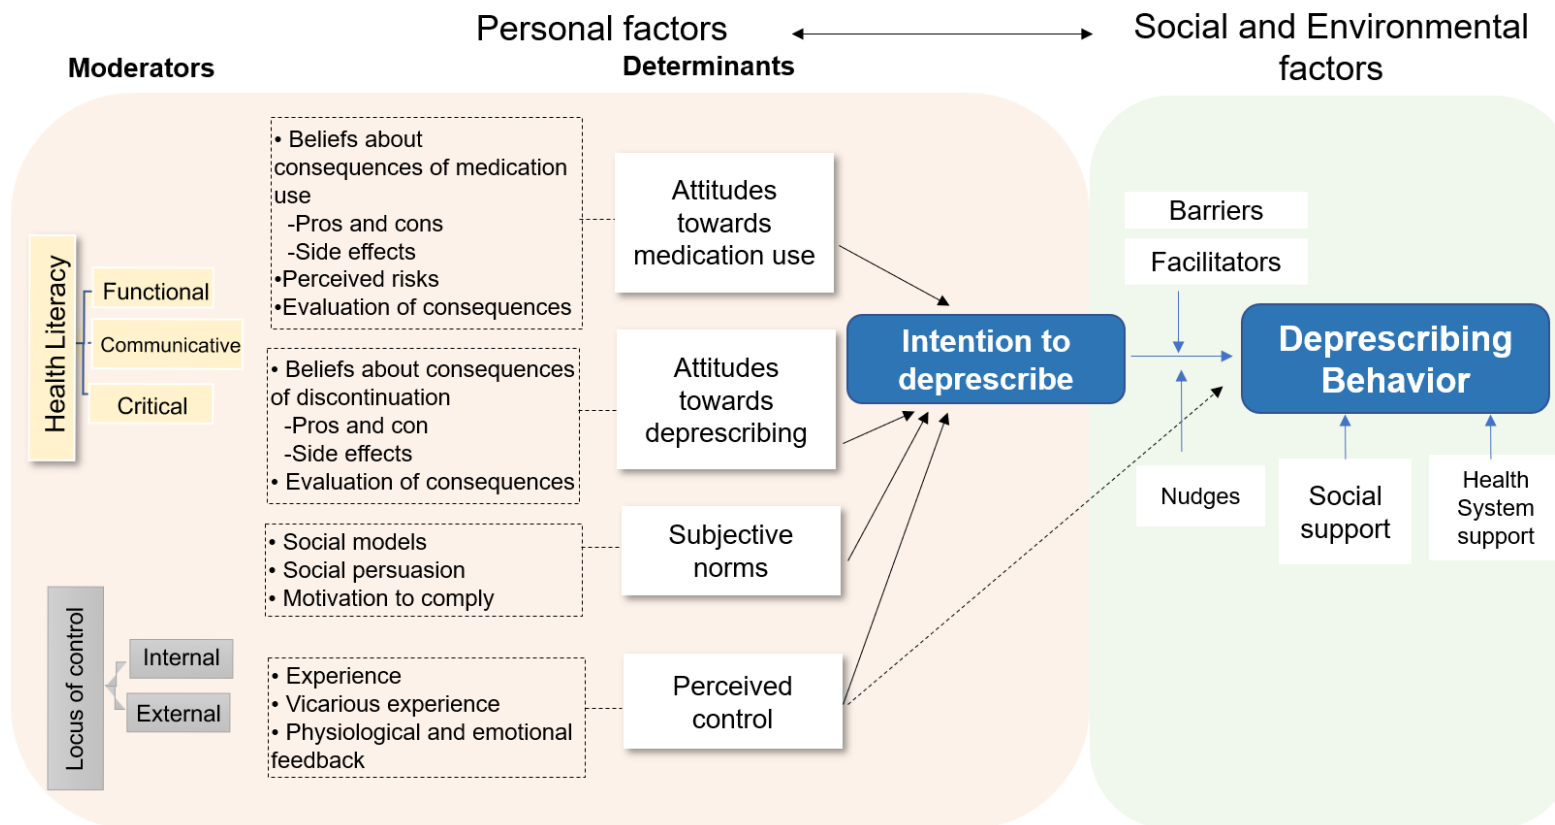

Supplementary Figure 1. Deprescribing hypothetical model.

Hypothetical model developed by Alves Jorge S, Van den Broecke S, Koumba Maguena RJ, and Spinewine A. (2024) based on a systematic review supporting the development of questionnaire dimensions and items.

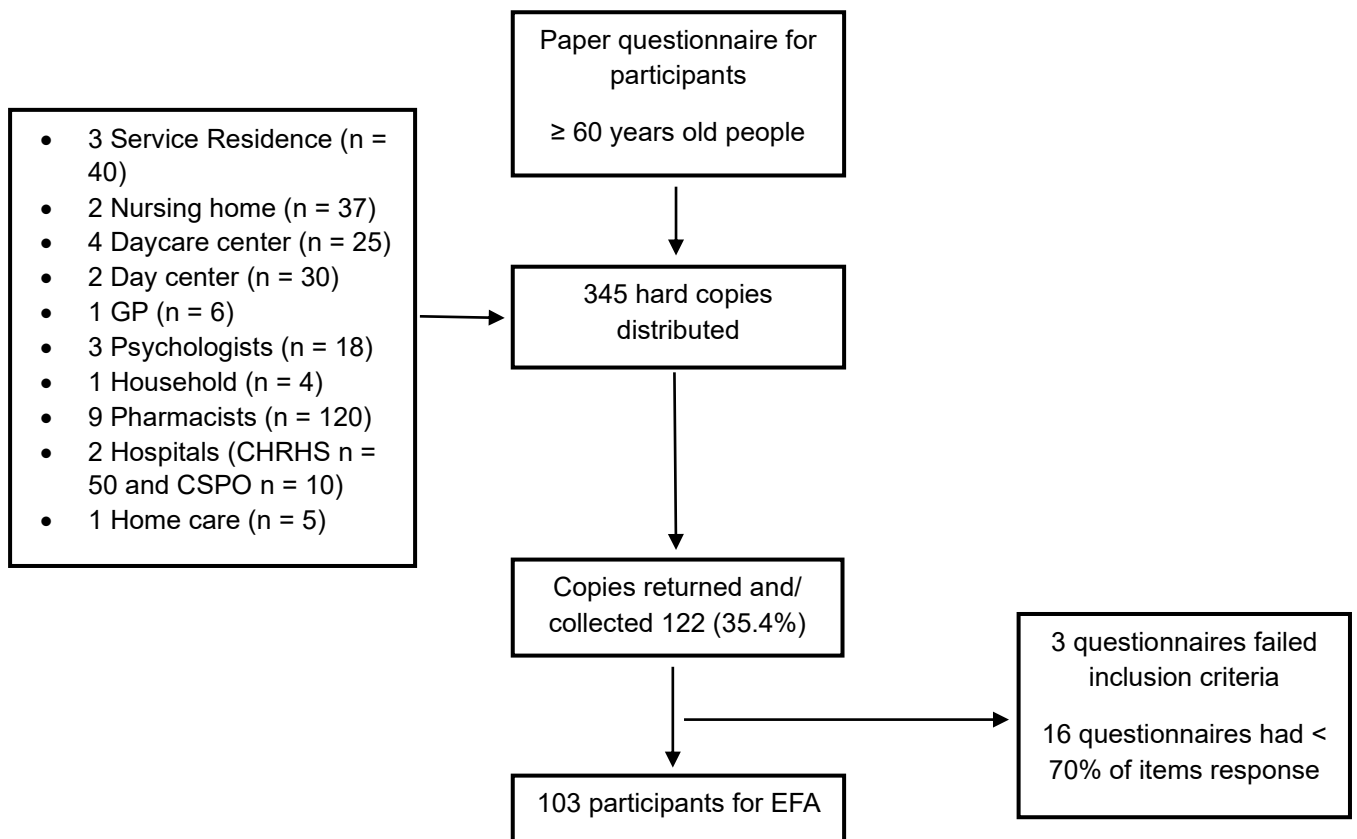

Supplementary Figure 2. Participants recruitment.

Legend: GP, General Practitioner. CHRHS, Centre Hospitalier Régional Haute Senne. CSPO, Clinique Saint Pierre d'Ottignies. EFA, Exploratory Factor Analysis.

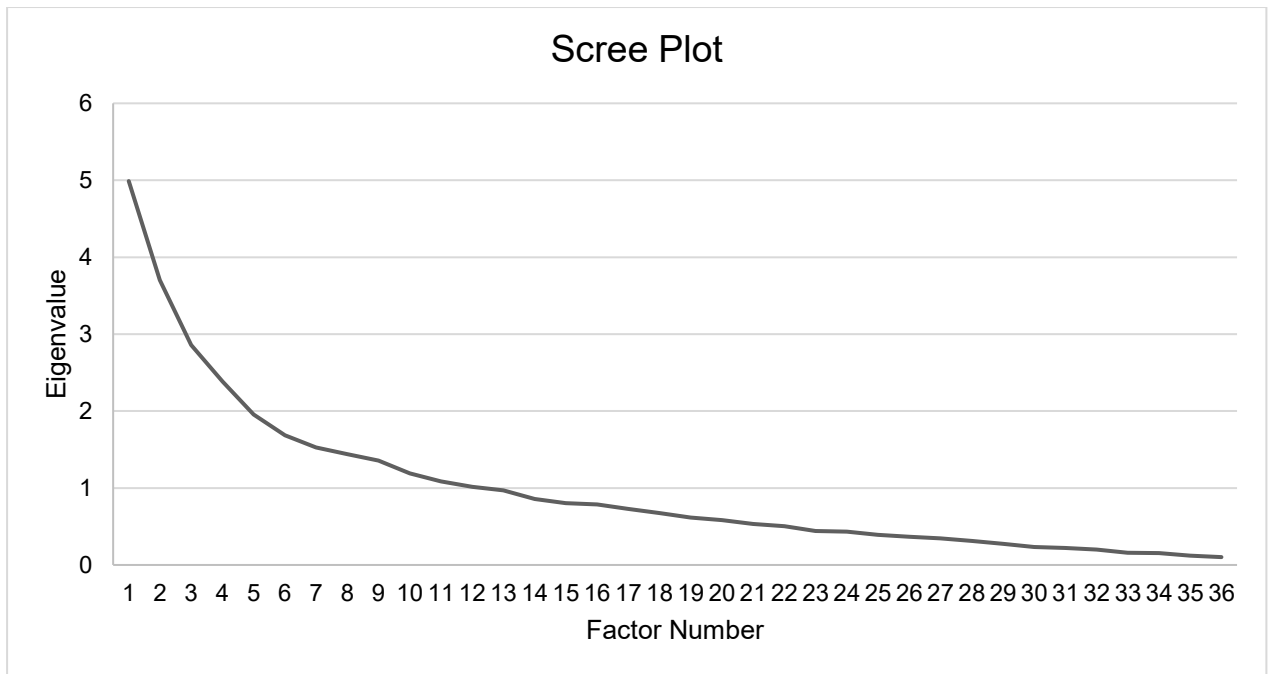

Supplementary Figure 3. Scree plot eigenvalues

The elbow after the 9th factor indicates that a 9-factor solution is most appropriate

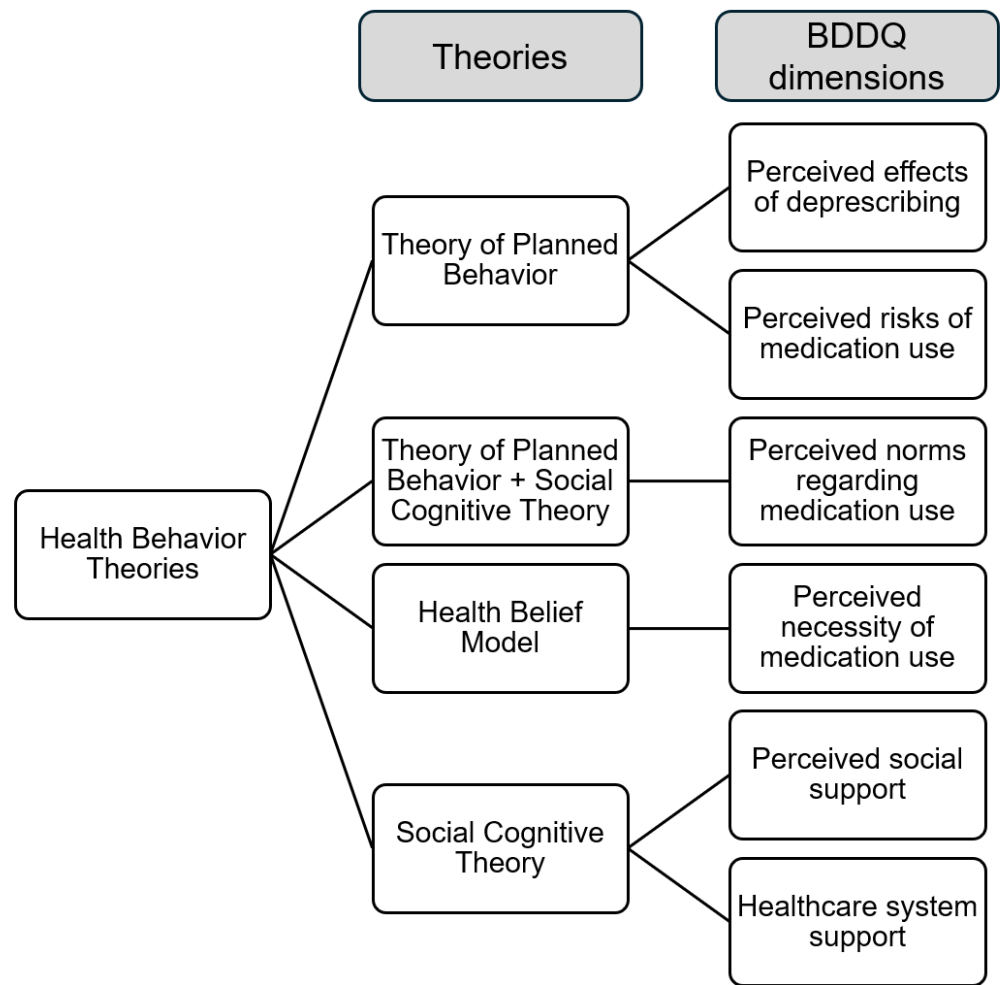

Supplementary Figure 4. Conceptual diagram mapping BDDQ dimensions to theoretical constructs  
 Legend: BDDQ, Behavioral Determinants of Deprescribing
